# Supplementary figures and images for: Inferring Evolutionary Timescale of Omsk Hemorrhagic Fever Virus
Source: MDPI journal article supplement (doi:10.3390/v15071576), 2023-07-19

**CGhet**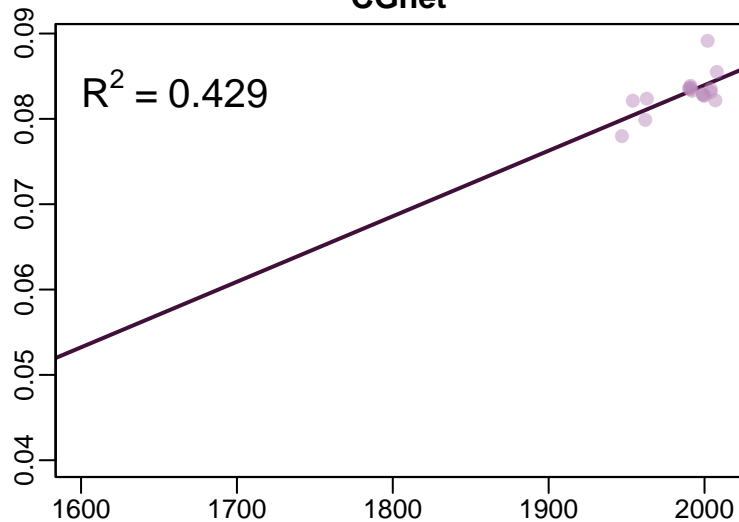**CGhet+iso**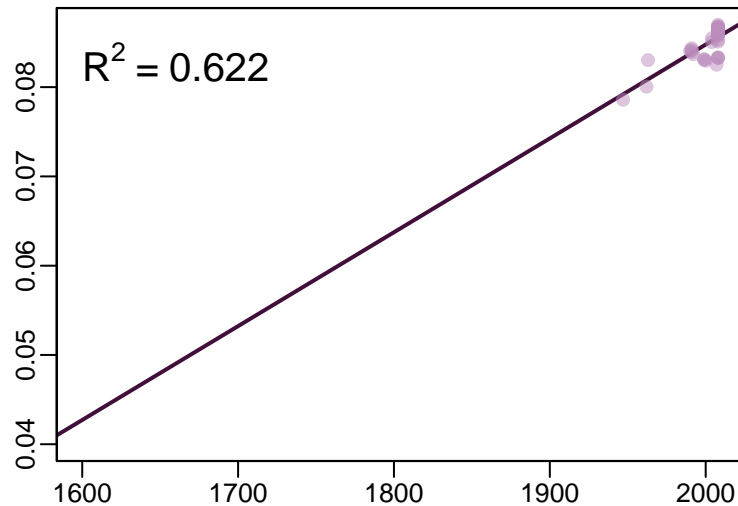**Ehet**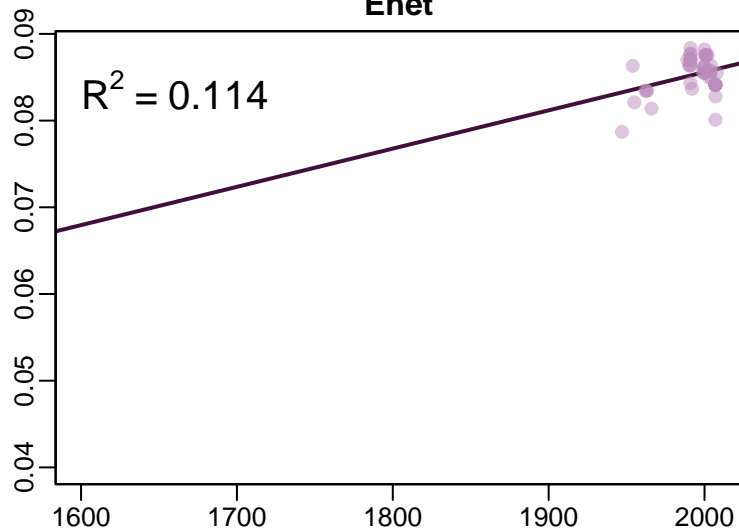**Ehet+iso**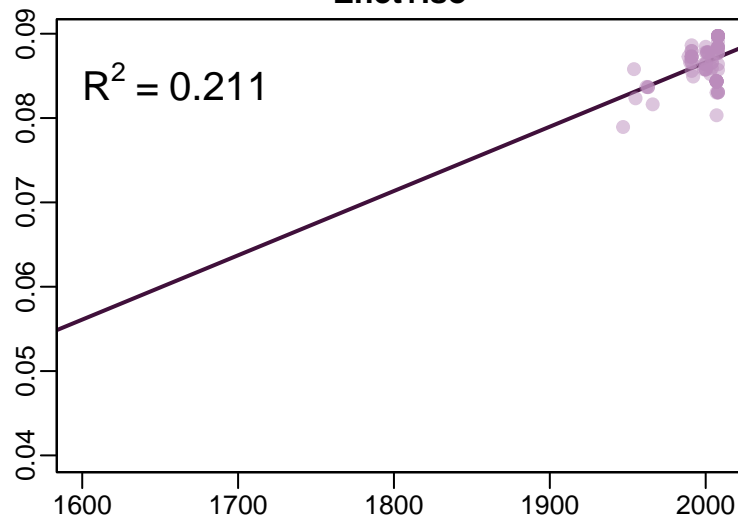

Supplement: s1 [file s1]
